# Supplementary material
Source: Springer Nature journal article supplement (https://www.springermedizin.de/resource/supplementary/12943_2013_1112_MOESM7_ESM.pdf/9552520)

**A**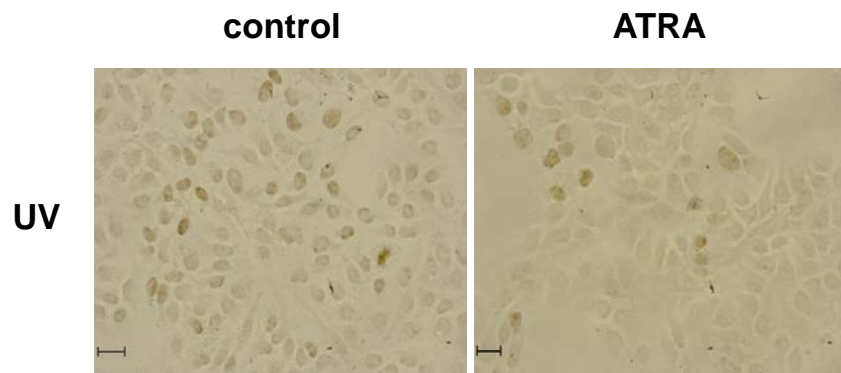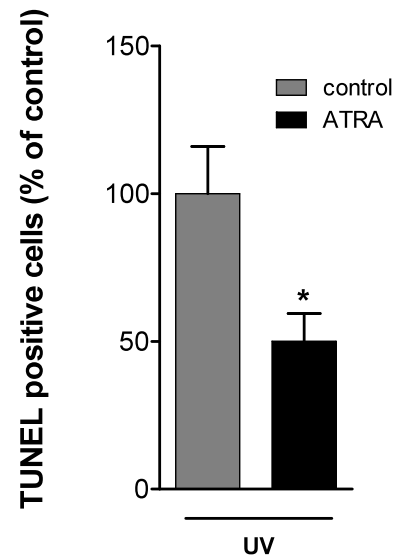**B**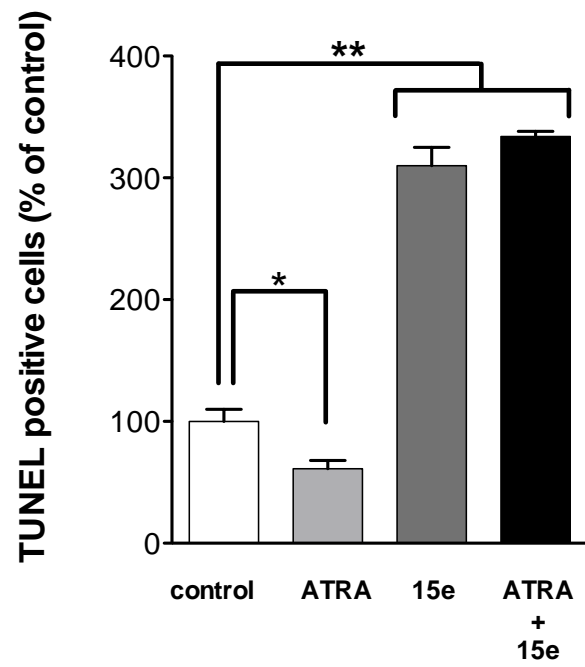**C**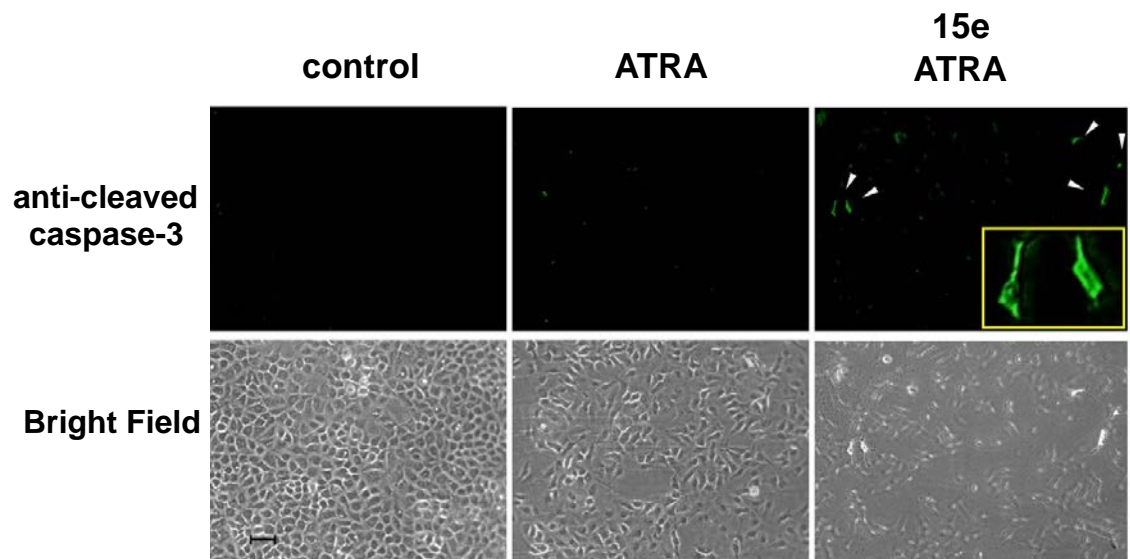

Supplement: MOESM7 [file 9552520]
